# Supplementary material for: Serum Uric Acid Is Associated with Metabolic Syndrome and Insulin Resistance among Health Personnel from Peru
Source: Hindawi journal article supplement (doi:10.1155/2021/9933319), 2021-11-15
Supplement: f1 [file 9933319.f1.pdf]

## Supplementary appendix

**Table S1:** Data excluded by implausible or missing values.

| Variables           | Overall population (n = 367) |             |                |
|---------------------|------------------------------|-------------|----------------|
|                     | Missing                      | Implausible | Total excluded |
| Glucose             | 18                           | 1           | 19             |
| Total cholesterol   | 0                            | 2           | 2              |
| HDL-C               | 5                            | 11          | 16             |
| LDL cholesterol     | 1                            | 1           | 2              |
| VLDL cholesterol    | 0                            | 2           | 2              |
| HbA1c               | 2                            | 3           | 5              |
| Serum Uric Acid     | 1                            | 1           | 2              |
| Waist circumference | 11                           | 0           | 11             |
| Body fat percentage | 2                            | 1           | 3              |
| Findrisc_1          | 1                            | 1           | 2              |
| Findrisc_2          | 1                            | 0           | 1              |
| Findrisc_6          | 0                            | 1           | 1              |
| Findrisc_8          | 0                            | 3           | 3              |
| Smoking             | 3                            | 1           | 4              |
| Age                 | 1                            | 1           | 2              |
| Summatory           | 46                           | 29          | 75             |
| Percentage (%)      | 12.5                         | 7.9         | 20.4           |

LDL-C, low density lipoprotein cholesterol; VLDL-C, very low-density lipoprotein cholesterol; HDL-C, high density lipoprotein cholesterol; HbA1c, glycosylated hemoglobin

**Description of data:** Data excluded from the Plan for the Prevention and Surveillance of Communicable and Non-Communicable Diseases by implausible or missing values.

**Table S2: General characteristics of the healthcare personnel by sex and MetS**

| Variable                 | Overall population | Men (n=90)     |              | P-value   | Women (n=202)   |              | p value   |
|--------------------------|--------------------|----------------|--------------|-----------|-----------------|--------------|-----------|
|                          | (n=292)            | No-MetS (n=57) | MetS (n=33)  |           | No-MetS (n=124) | MetS (n=78)  |           |
| Age (years)              | 46.2 ± 10.6        | 45.6 ± 11.2    | 51.5 ± 10.2  | 0.014*    | 43.2 ± 10.1     | 49.0 ± 9.7   | < 0.001** |
| Weight (Kg)              | 67.9 ± 13.0        | 70.9 ± 12.1    | 82.7 ± 12.8  | < 0.001** | 60.7 ± 9.8      | 71.2 ± 10.4  | < 0.001** |
| BMI (Kg/m <sup>2</sup> ) | 28.1 ± 4.3         | 26.8 ± 3.7     | 30.4 ± 3.7   | < 0.001** | 26.3 ± 3.7      | 30.6 ± 4.0   | < 0.001** |
| Waist circumference (cm) | 91.8 ± 10.8        | 91.7 ± 12.3    | 103.0 ± 7.4  | < 0.001** | 86.1 ± 9.2      | 96.3 ± 6.7   | < 0.001** |
| Body fat (%)             | 33.0 ± 6.7         | 25.7 ± 5.6     | 29.4 ± 3.0   | < 0.001** | 33.8 ± 5.4      | 38.5 ± 4.4   | < 0.001** |
| Glucose (mg/dL)          | 95.9 ± 32.7        | 93.6 ± 14.0    | 114.0 ± 48.9 | 0.027*    | 90.8 ± 32.8     | 98.2 ± 31.5  | 0.111     |
| Cholesterol (mg/dL)      | 193.1 ± 37.0       | 187.0 ± 35.5   | 216.0 ± 34.7 | < 0.001** | 187.0 ± 33.4    | 199.0 ± 40.4 | 0.034*    |
| Triglycerides (mg/dL)    | 153.7 ± 79.3       | 142.0 ± 77.2   | 234.0 ± 92.7 | < 0.001** | 116.0 ± 54.3    | 188.0 ± 69.4 | < 0.001** |
| LDL-C (mg/dL)            | 114.3 ± 31.0       | 113.0 ± 28.7   | 129.0 ± 32.7 | 0.019*    | 111.0 ± 25.6    | 114.0 ± 37.8 | 0.460     |
| VLDL-C (mg/dL)           | 29.07 ± 12.79      | 27.1 ± 11.5    | 40.5 ± 13.9  | < 0.001** | 24.5 ± 10.4     | 36.6 ± 12.8  | < 0.001** |
| HDL-C (mg/dL)            | 49.8 ± 10.3        | 47.1 ± 7.7     | 47.5 ± 9.6   | 0.818     | 53.0 ± 11.2     | 47.8 ± 9.5   | < 0.001** |
| HbA1c (%)                | 6.0 ± 1.0          | 5.8 ± 0.6      | 6.6 ± 1.8    | 0.028*    | 5.8 ± 0.8       | 6.2 ± 1.0    | < 0.001** |
| Uric acid (mg/dL)        | 3.9 ± 1.0          | 4.6 ± 0.8      | 4.9 ± 0.9    | 0.054     | 3.3 ± 0.8       | 3.8 ± 0.8    | < 0.001** |
| SBP (mmHg)               | 108.1 ± 13.4       | 110.0 ± 12.0   | 123.0 ± 11.5 | < 0.001** | 103.0 ± 11.1    | 109.0 ± 13.4 | < 0.001** |
| DBP (mmHg)               | 68.8 ± 10.5        | 69.3 ± 9.8     | 80.3 ± 10.7  | < 0.001** | 65.0 ± 8.8      | 69.7 ± 9.8   | < 0.001** |
| Uric acid tertiles (%)   |                    |                |              |           |                 |              |           |
| T1 <sup>a</sup>          | 100 (34.2)         | 26 (78.8)      | 7 (21.2)     | 0.068     | 57 (78.1)       | 16 (21.9)    | < 0.001** |
| T2 <sup>a</sup>          | 96 (32.9)          | 15 (53.6)      | 13 (46.4)    |           | 40 (64.5)       | 22 (35.5)    |           |
| T3 <sup>a</sup>          | 96 (32.9)          | 16 (55.2)      | 13 (44.8)    |           | 27 (40.3)       | 40 (59.7)    |           |

Data expressed as mean ± standard deviation or number (percentage). MetS, Metabolic Syndrome; BMI, Body mass index; LDL-C, Low density lipoprotein cholesterol; VLDL-C, Very lowdensity lipoprotein cholesterol; HDL-C, High density lipoprotein cholesterol; HbA1c, Glycosylated hemoglobin; SBP, Systolic blood pressure; DBP, Diastolic blood pressure; T1, Low tertile; T2, Middle tertile; T3, high tertile. \*p < 0.05, \*\*p < 0.01, <sup>a</sup>Interval of uric acid depend of the group (overall population, male or women).

The p value was calculated for the numeric variables with the Welch Two Sample t-test, and for the categorical variables with Chi-Square test.
